# Supplementary material for: Altered Expression of MGMT in High-Grade Gliomas Results from the Combined Effect of Epigenetic and Genetic Aberrations
Source: PubMed Central journal article supplement (PMC3594314; doi:10.1371/journal.pone.0058206), 2013-03-11
Supplement: pone.0058206.s001.pdf [file pone.0058206.s001.pdf]

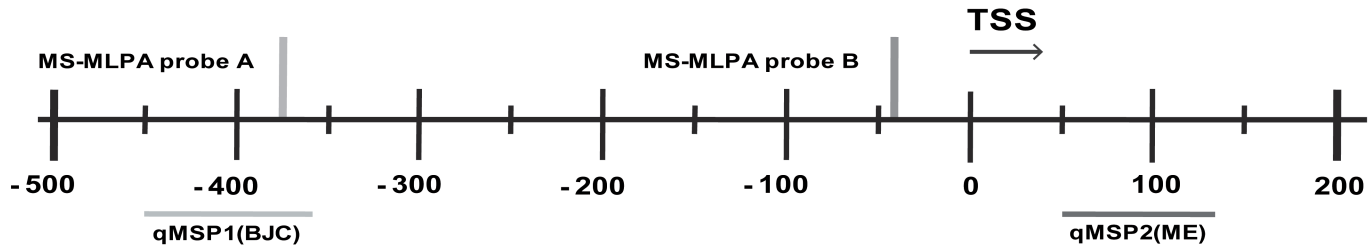

Abbreviations: TSS - transcription start site; qMSP - quantitative methylation-specific PCR; MS-MLPA - Methylation-specific MLPA
